# Supplementary material
Source: PubMed Central journal article supplement (PMC7837185)

Location of the sampled sites in public areas next to COVID-19 conventional hospitalization units

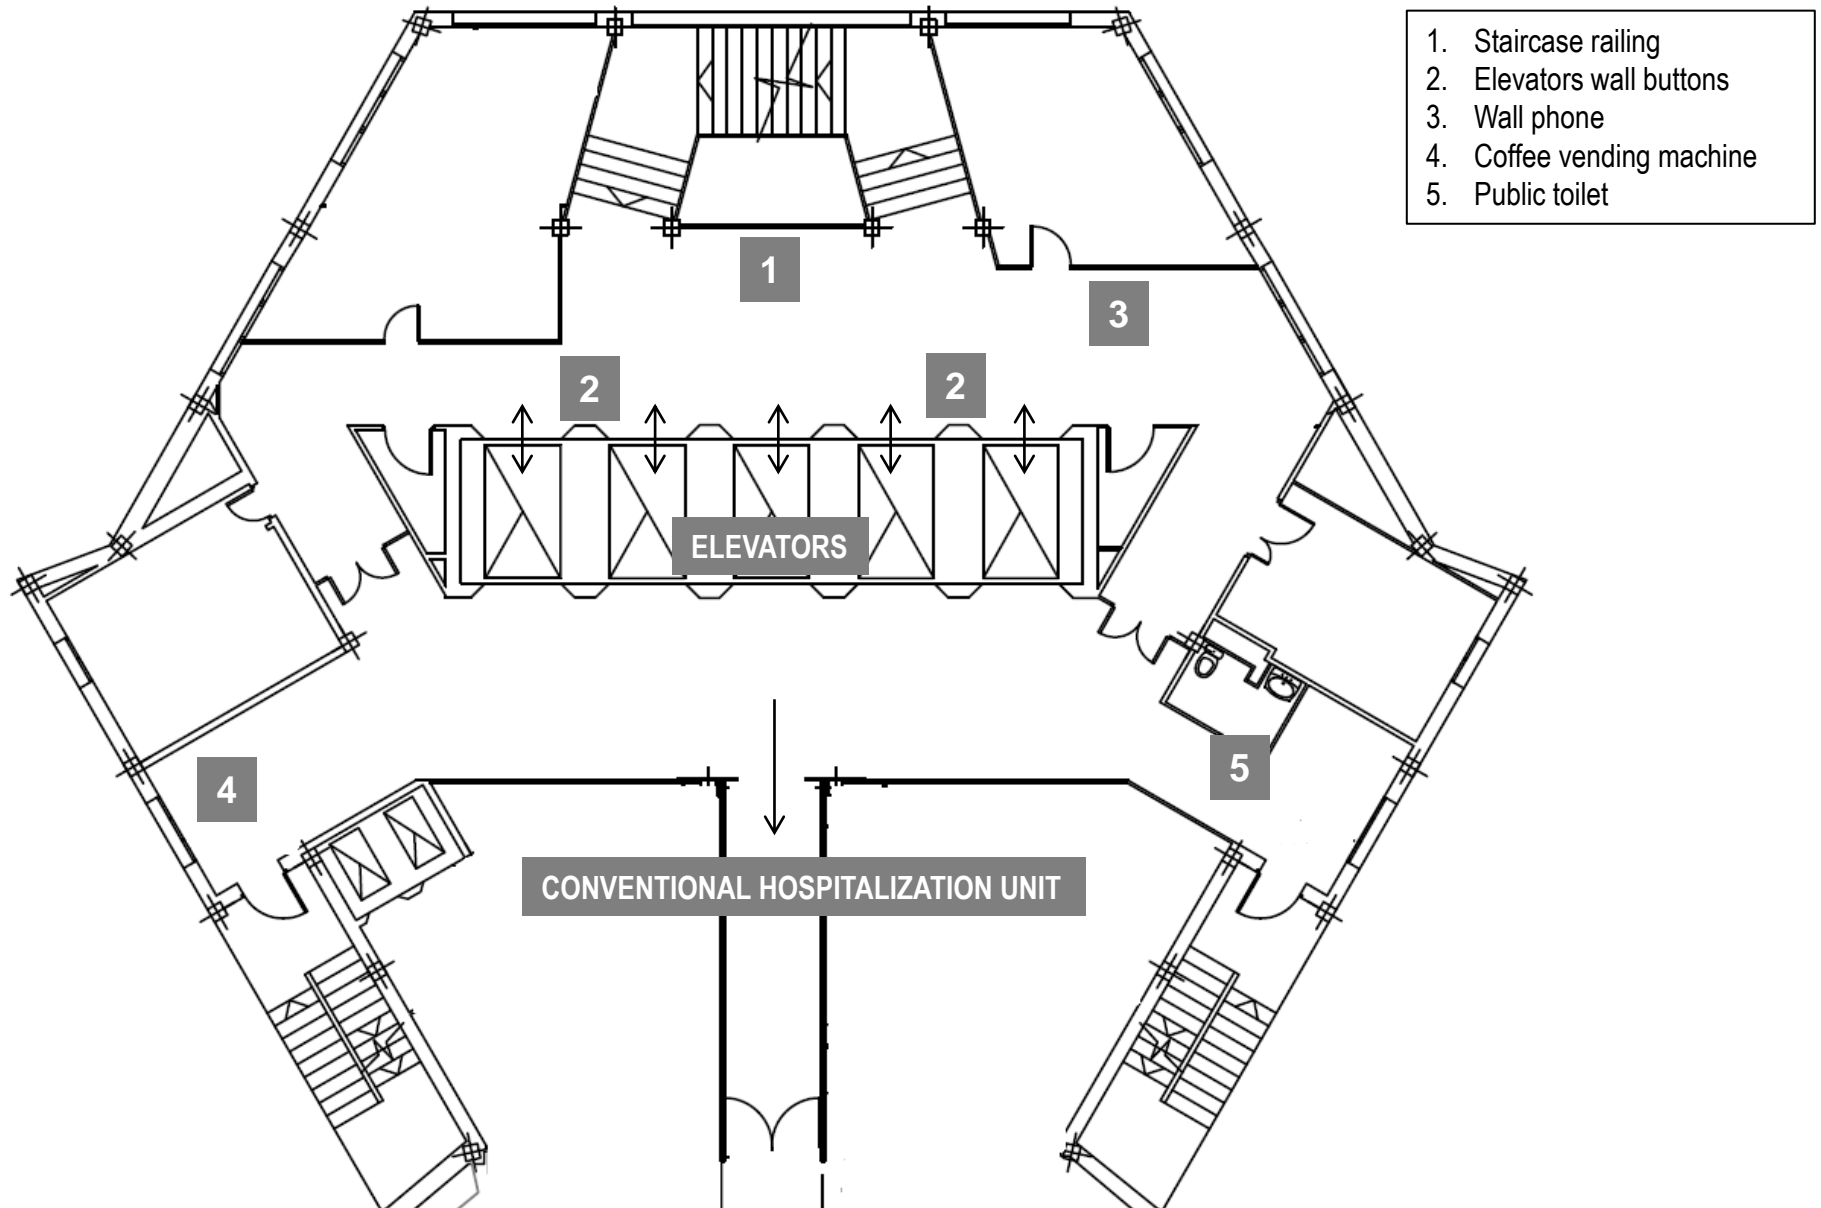

Location of the sampled sites in public areas next to COVID-19 intensive care units

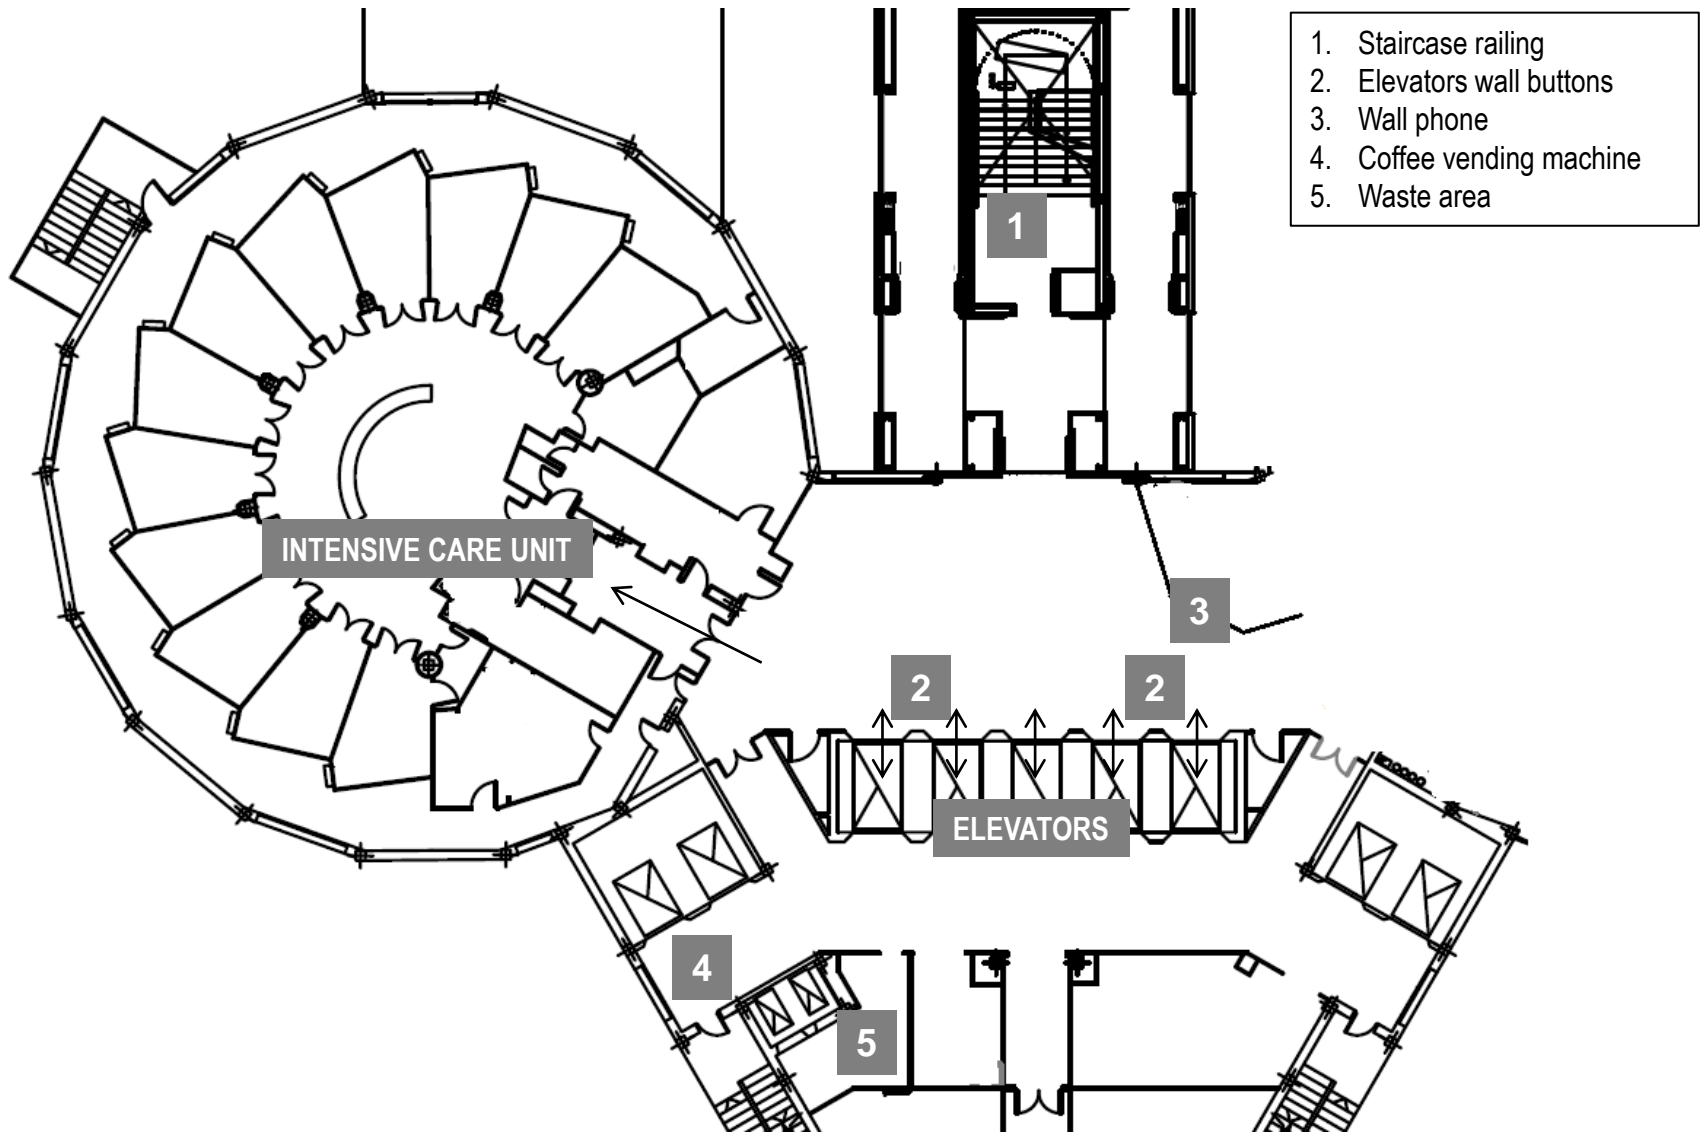

Supplement: mmc1.pdf [file mmc1.pdf]
